# Supplementary material for: An Integrative Approach to Investigate the Mode of Action of (−)-Dendroparishiol in Bacterial Meningitis: Computer-Aided Estimation of Biological Activity and Network Pharmacology
Source: MDPI journal article supplement (doi:10.3390/ijms24098072), 2023-04-29
Supplement: s1 [file s1]

**Supplementary Information for**  
**An integrative approach to investigate the mode of action of**  
**(-)-dendroparishioli in bacterial meningitis: computer-aided**  
**estimation of biological activity and network pharmacology**

**Table S1:** Summary of top ten GO terms associated with the biological activity of (-)-dendroparishioli in bacterial meningitis.

| Category | Pathway ID | Pathway Description                                                         | p.adjusted   | FDR         |
|----------|------------|-----------------------------------------------------------------------------|--------------|-------------|
| GO_BP    | GO:0034599 | Cellular response to oxidative stress                                       | 1.708025E-07 | 7.11518E-08 |
|          | GO:0062197 | Cellular response to chemical stress                                        | 2.80014E-07  | 1.16646E-07 |
|          | GO:1904645 | Response to amyloid-beta                                                    | 6.33716E-07  | 2.63989E-07 |
|          | GO:0006979 | Response to oxidative stress                                                | 9.36702E-07  | 3.90205E-07 |
|          | GO:0034614 | Cellular response to reactive oxygen species                                | 1.8377E-06   | 7.65539E-07 |
|          | GO:0000302 | Response to reactive oxygen species                                         | 1.06021E-05  | 4.41656E-06 |
|          | GO:1904707 | Positive regulation of vascular associated Smooth muscle cell proliferation | 2.37983E-05  | 9.91373E-06 |
|          | GO:0097193 | Intrinsic apoptotic signaling pathway                                       | 2.76511E-05  | 1.15187E-05 |
|          | GO:0032768 | Regulation of monooxygenase activity                                        | 5.74165E-05  | 2.39182E-05 |
|          | GO:0150076 | Neuroinflammatory response                                                  | 9.64407E-05  | 4.01746E-05 |
| GO_CC    | GO:0000784 | Nuclear chromosome, telomeric region                                        | 0.003698013  | 0.001890713 |
|          | GO:0101002 | Ficolin-1-rich granule                                                      | 0.003698013  | 0.001890713 |
|          | GO:1904813 | Ficolin-1-rich granule lumen                                                | 0.003698013  | 0.001890713 |
|          | GO:0000781 | Chromosome, telomeric region                                                | 0.0050541    | 0.002584051 |
|          | GO:0070820 | Tertiary granule                                                            | 0.0050541    | 0.002584051 |
|          | GO:0101003 | Ficolin-1-rich granule membrane                                             | 0.014729917  | 0.007531085 |
|          | GO:0034774 | Secretory granule lumen                                                     | 0.020757477  | 0.010612845 |
|          | GO:0060205 | Cytoplasmic vesicle lumen                                                   | 0.020757477  | 0.010612845 |
|          | GO:0031983 | Vesicle lumen                                                               | 0.020757477  | 0.010612845 |
|          | GO:0098687 | Chromosomal region                                                          | 0.022444652  | 0.011475461 |
| GO_MF    | GO:0004875 | Complement receptor activity                                                | 0.008164383  | 0.003571569 |
|          | GO:0004222 | Metalloendopeptidase activity                                               | 0.009772931  | 0.00427524  |
|          | GO:0140375 | Immune receptor activity                                                    | 0.010436213  | 0.004565397 |
|          | GO:0008528 | G protein-coupled peptide receptor activity                                 | 0.010436213  | 0.004565397 |
|          | GO:0001653 | Peptide receptor activity                                                   | 0.010436213  | 0.004565397 |
|          | GO:0004252 | Serine-type endopeptidase activity                                          | 0.010436213  | 0.004565397 |
|          | GO:0042162 | Telomeric DNA binding                                                       | 0.010436213  | 0.004565397 |
|          | GO:0008236 | Serine-type peptidase activity                                              | 0.010436213  | 0.004565397 |
|          | GO:0008237 | Metallopeptidase activity                                                   | 0.010436213  | 0.004565397 |
|          | GO:0017171 | Serine hydrolase activity                                                   | 0.010436213  | 0.004565397 |

**Table S2.** Summary of top ten significant KEGG pathway terms modulated by (–)-dendroparishioid in bacterial meningitis

| Pathway ID | Pathway Description                                  | p.adjusted  | FDR         |
|------------|------------------------------------------------------|-------------|-------------|
| hsa04668   | TNF signaling pathway                                | 0.000404638 | 0.000209048 |
| hsa05418   | Fluid shear stress and atherosclerosis               | 0.000586342 | 0.000302921 |
| hsa04657   | IL-17 signaling pathway                              | 0.001076687 | 0.000556248 |
| hsa05215   | Prostate cancer                                      | 0.001076687 | 0.000556248 |
| hsa05415   | Diabetic cardiomyopathy                              | 0.001076687 | 0.000556248 |
| hsa04933   | AGE-RAGE signaling pathway in diabetic complications | 0.001076687 | 0.000556248 |
| hsa05205   | Proteoglycans in cancer                              | 0.001076687 | 0.000556248 |
| hsa04064   | NF-kappa B signaling pathway                         | 0.001076687 | 0.000556248 |
| hsa05417   | Lipid and atherosclerosis                            | 0.001076687 | 0.000556248 |
| hsa04670   | Leukocyte transendothelial migration                 | 0.001244516 | 0.000642953 |
